# Supplementary material for: Plasma eNOS Concentration in Healthy Pregnancy and in Hypertensive Disorders of Pregnancy: Evidence of Reduced Concentrations in Pre-Eclampsia from Two Independent Studies
Source: MDPI journal article supplement (doi:10.3390/diseases11040155), 2023-11-01
Supplement: s1 [file s1]

## Supplementary material

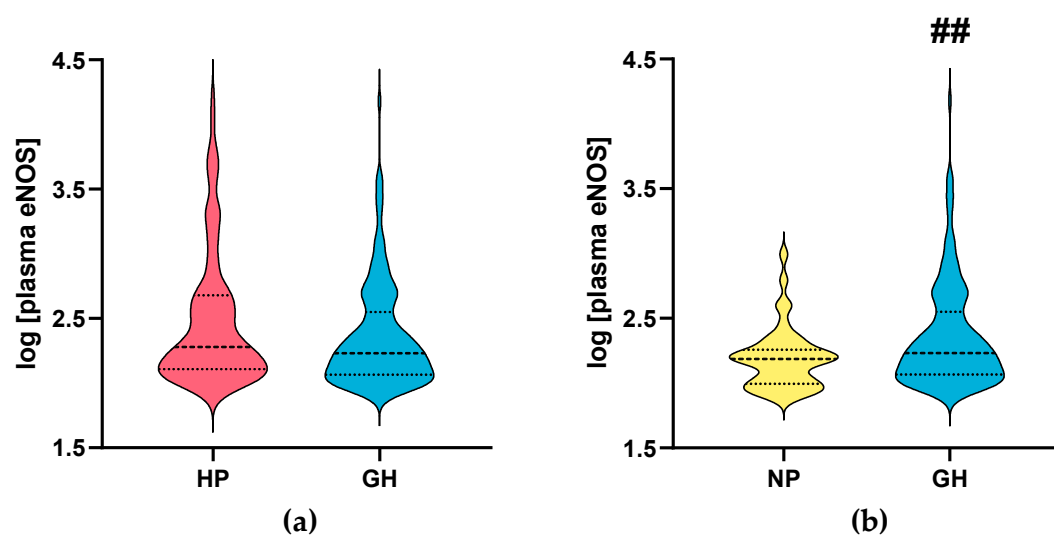

**Figure S1.** Logarithm of plasma eNOS concentrations from gestational hypertension (GH) patients compared with **(a)** healthy pregnant women (HP), and **(b)** with non-pregnant (NP) women. ## ( $p < 0.05$ ) when compared to NP.

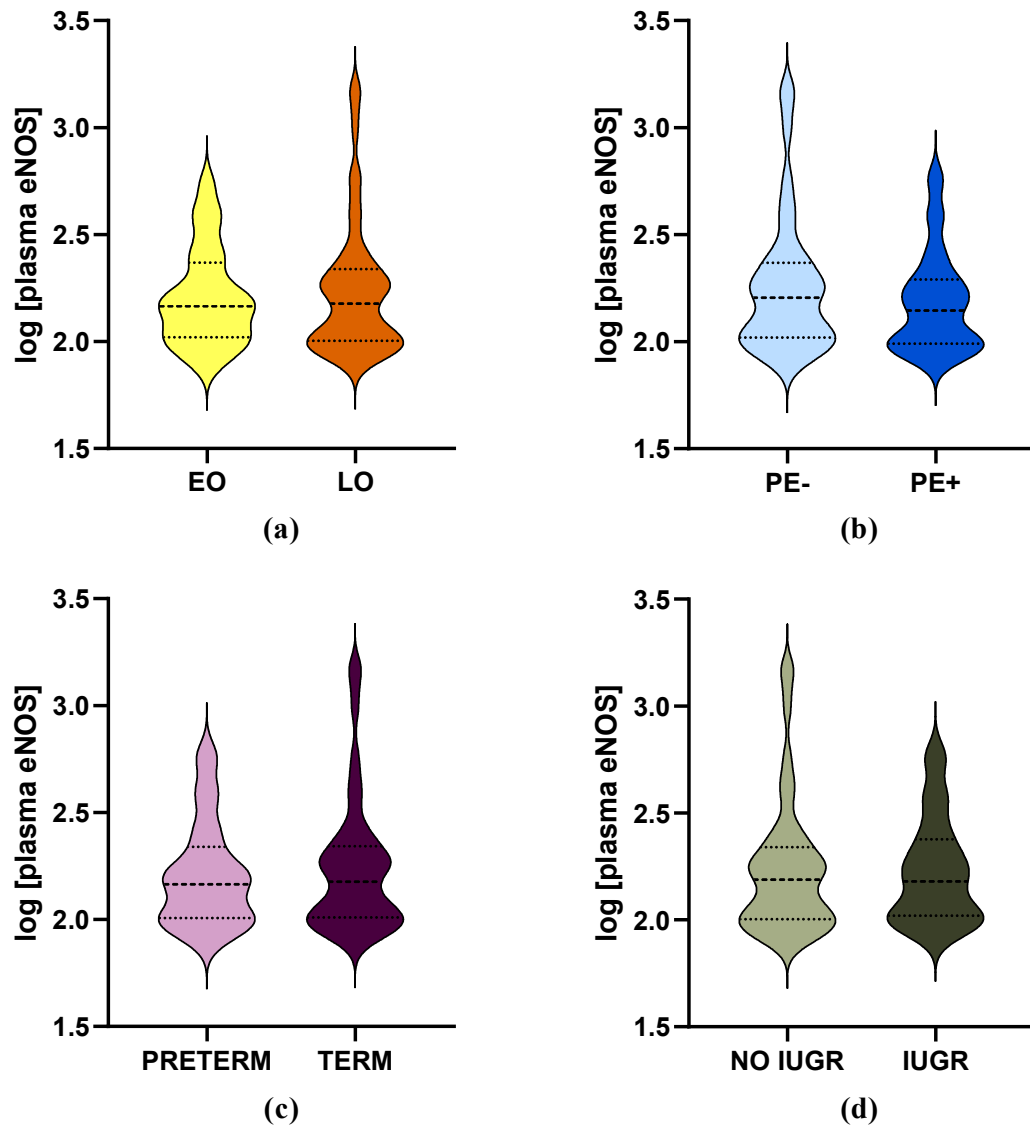

**Figure S2.** Logarithm of plasma eNOS concentrations considering the subgroups of patients with preeclampsia (PE): **(a)** early-onset PE (EO) and late-onset PE (LO); **(b)**, PE without (PE-) and with (PE+) severe features; **(c)** preterm birth; and **(d)** intrauterine growth restriction (IUGR). None of the comparisons between these groups were significant ( $p > 0.05$ ).

**Table S1.** Clinical, demographic, and biochemical characteristics of women enrolled in the replication study enrolled in the replication study.

| Parameters        | Healthy Pregnant | Preeclampsia     | <i>p</i> -Value |
|-------------------|------------------|------------------|-----------------|
|                   | ( <i>n</i> = 41) | ( <i>n</i> = 44) |                 |
| Age (years)       | 22.6 ± 4.5       | 25.9 ± 8.0       | 0.1238          |
| GAS (weeks)       | 31.2 ± 5.7       | 33.9 ± 4.6       | <b>0.0302</b>   |
| Uric acid (mg/dL) | ND               | 6.0 ± 1.7        | –               |
| 24-h Pr (mg/24 h) | NA               | 2554.0 ± 3782.0  | –               |
| Severity (%)      | NA               | 70               | –               |

Abbreviations: GAS, gestational age at sampling; 24-h Pr, 24-h proteinuria; ND, not determined; NA, not applicable. Data are expressed as mean ± S.D. Bold value is significant *p*-value.

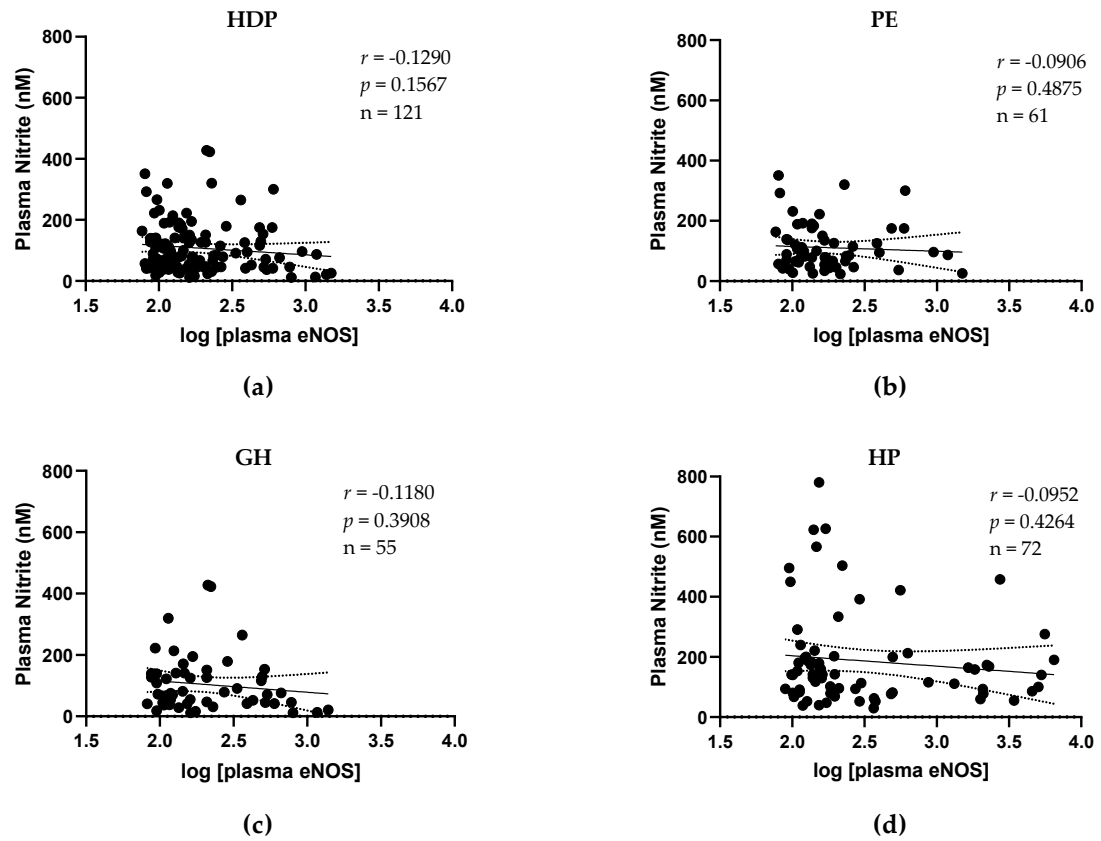

**Figure S3.** Correlations between logarithm of plasma eNOS concentrations and concentrations of plasma nitrite (nM) in (a) women with hypertensive disorders of pregnancy (HDP), pregnant women with (b) preeclampsia (PE), (c) gestational hypertension (GH), and (d) healthy pregnant women (HP).
